# Supplementary material for: Intronless WNT10B-short variant underlies new recurrent allele-specific rearrangement in acute myeloid leukaemia
Source: PubMed Central journal article supplement (PMC5112549; doi:10.1038/srep37201), 2016-11-17
Supplement: srep37201-s1.pdf [file srep37201-s1.pdf]

1 **Intronless WNT10B-short variant underlies new recurrent allele-specific**  
2 **rearrangement in acute myeloid leukaemia**

3

4 Francesca Lazzaroni<sup>1</sup>, Luca Del Giacco<sup>2</sup>, Daniele Biasci<sup>3</sup>, Mauro Turrini<sup>4</sup>, Laura Prospero<sup>2</sup>, Roberto  
5 Brusamolino<sup>5</sup>, Roberto Cairoli<sup>6</sup>, Alessandro Beghini<sup>1</sup>

6

7 <sup>1</sup>Department of Health Sciences, University of Milan, Milan, Italy.

8 <sup>2</sup>Department of Biosciences, University of Milan, Milan, Italy.

9 <sup>3</sup>Cambridge Institute for Medical Research, University of Cambridge, Cambridge, UK

10 <sup>4</sup>Department of Internal Medicine, Valduce Hospital, Como, Italy

11 <sup>5</sup>Department of Pathology, Niguarda Hospital, Milan, Italy.

12 <sup>6</sup>Department of Oncology, Hematology Unit, Niguarda Hospital, Milan, Italy.

13

14

15

16 Corresponding Author:

17 Alessandro Beghini

18 University of Milan, Medical Faculty

19 Department of Health Sciences

20 Via Rudini, 8

21 Milan 20142, Italy

22 Tel +39 02 503.23230; email: [alessandro.beghini@unimi.it](mailto:alessandro.beghini@unimi.it)

23

24

25

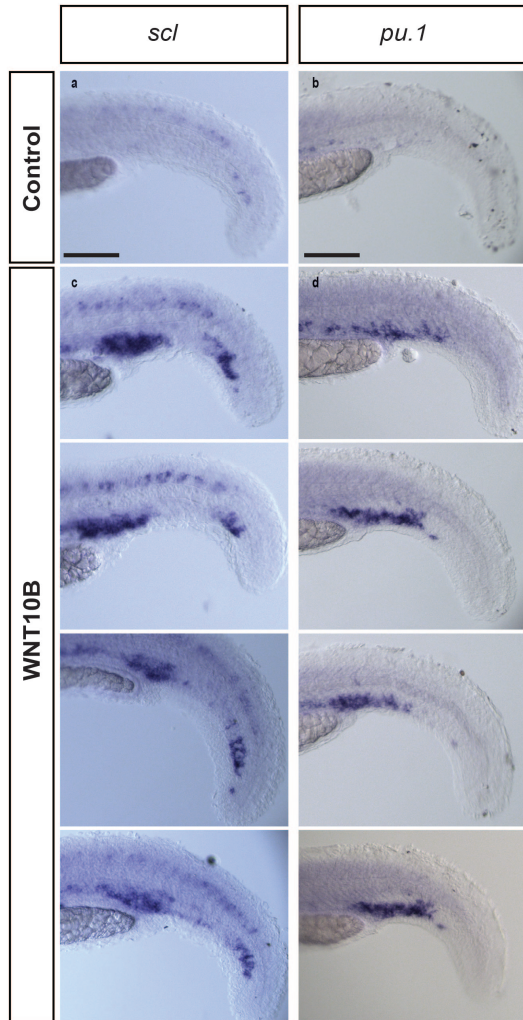

26

27

28

29 **Supplementary Figure 1. *wnt10b* overexpression promotes the accumulation of the**  
 30 **hematopoietic precursors in the PBI.**

31 **a, b**, Magnification of representative whole mount *in-situ* hybridizations to *scl* and *pu.1* on 28  
 32 hours post fertilization (hpf) **c, d**, *wnt10b*-injected and control embryos. *Wnt10b*-  
 33 overexpressing embryos display a higher number of *scl*- and *pu.1*-expressing cells in the  
 34 PBI (see also Figure 1). Some of the images are composed of different pictures  
 35 corresponding to several focal planes, since a single focal plane cannot comprise all the  
 36 labeled areas. Scale bar, 50  $\mu$ m.

37

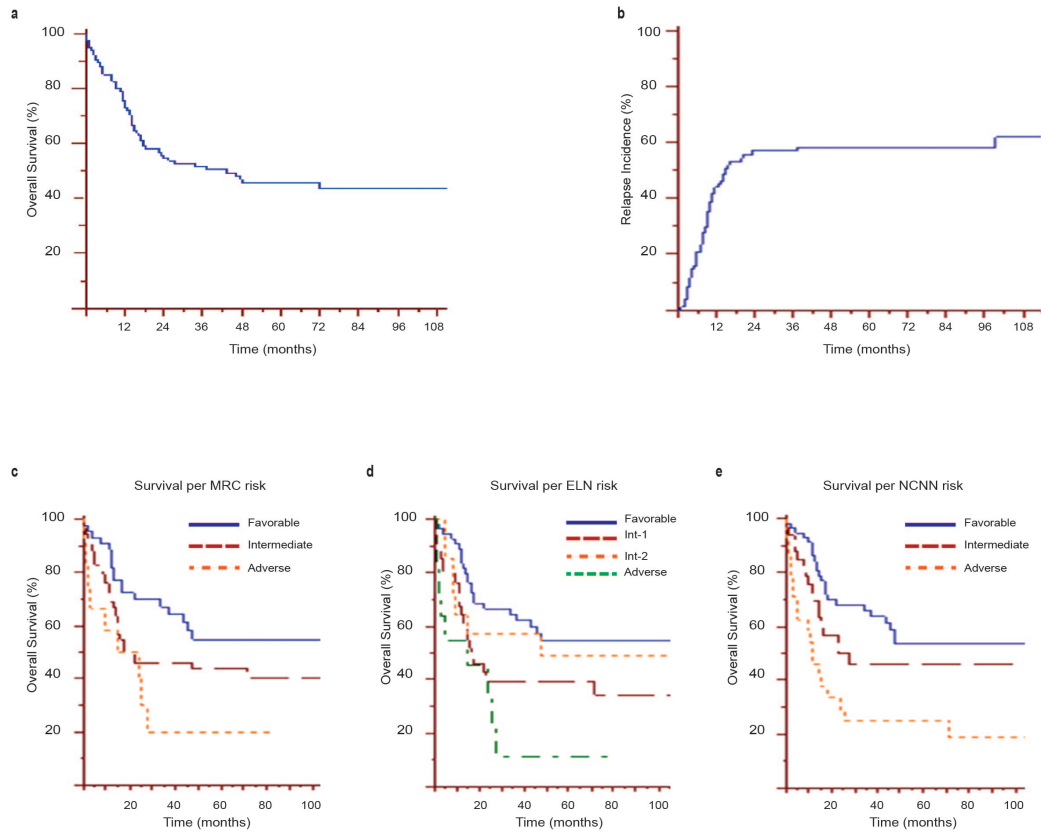

38

39 **Supplementary Figure 2. Treatment course and outcome of study population.**

40 **a, b**, Treatment schedule and outcome data were available for 116 out of 125 patients,  
 41 assessed for response. Complete Response was obtained from 97 out of 116 (83.6%)  
 42 patients. Primary refractory diseases and 5 infectious complication during post-  
 43 chemotherapy aplasia accounted for the 19 patients who did not achieve CR.  
 44 The median follow-up time was 65.5 months based on the reverse Kaplan-Meier method.  
 45 The estimated 5-year Overall Survival (**a**) and Relapse Incidence (**b**) resulted 45.8% and  
 46 58.1% respectively, with 37 patients alive in CR1 and 16 patients alive in second or  
 47 subsequent CR. **c, d, e**, Kaplan-Meier plots showing five-years OS per risk classification.  
 48 MRC risk classification: Favorable (54.9%), Intermediate (43.7%), Adverse (20.0%),  $p$   
 49 0.0314. ELN risk classification: Favorable (54.7%), Intermediate-1 (39.3%), Intermediate-2  
 50 (49.0%), Adverse (11.4%),  $p$  0.0133. NCNN risk classification: Favorable (53.6%),  
 51 Intermediate (45.9%), Adverse (25.0%),  $p$  0.0010.

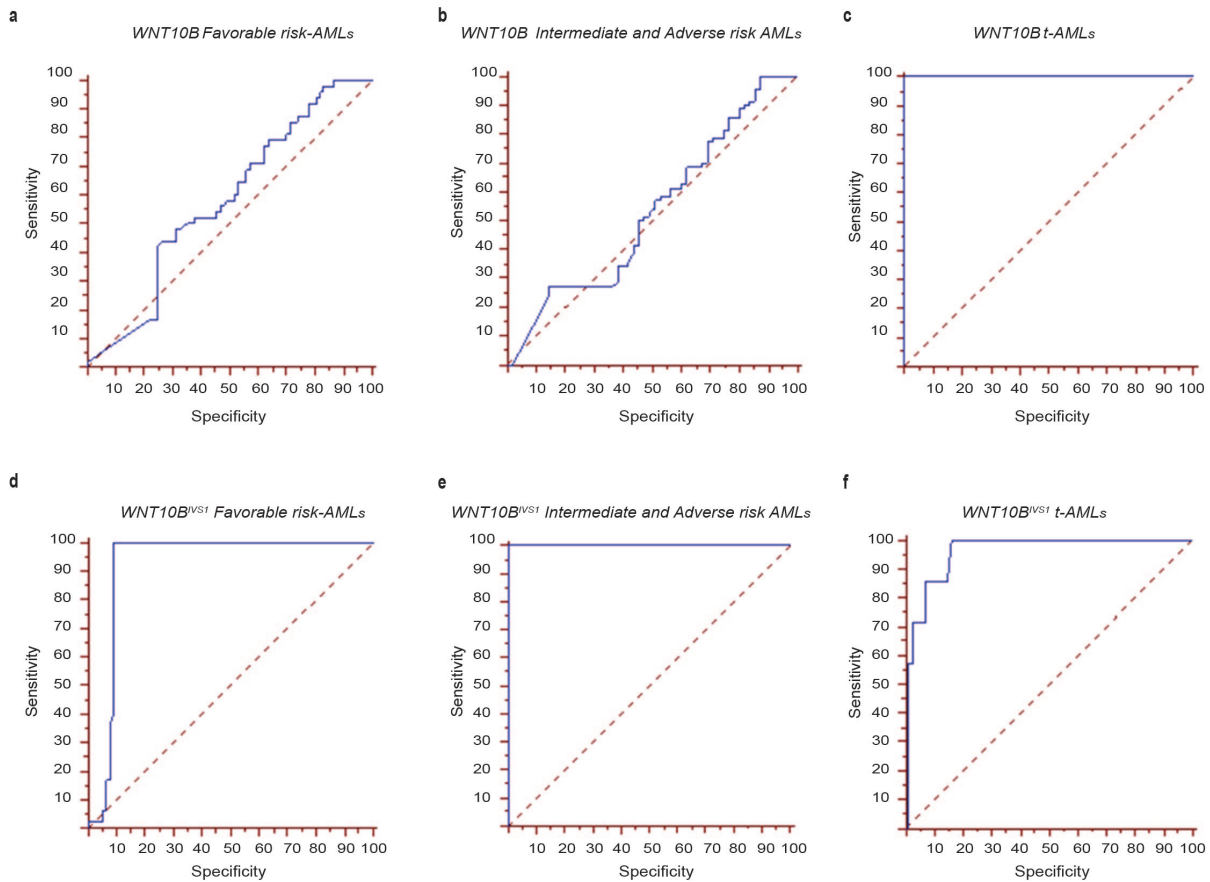

52

53 **Supplementary Figure 3. Receiver Operating Characteristic (ROC) curve analysis.**

54 Receiver Operating Characteristic (ROC) curve analysis of WNT10B and WNT10B<sup>IVS1</sup>  
 55 levels towards those three groups (favorable risk-AMLs, intermediate and adverse risk  
 56 AMLs and t-AMLs). **a, b, c**, WNT10B analysis showed an optimal cut-point at 123 when test  
 57 for therapy-related AMLs (AUC 1.0, sensitivity 100.0%, specificity 100.0%;  $p < 0.0001$ ), while  
 58 no possible cut-off points were identified for favorable-risk (AUC 0.578,  $p$  0.1432) or  
 59 Intermediate and adverse risk AML-patients (AUC 0.533,  $p$  0.5304). **d, e, f**, WNT10B<sup>IVS1</sup>  
 60 analysis showed an optimal cut-point at 221 when test for favorable-risk AMLs (AUC 0.918,  
 61 sensitivity 100.0%, specificity 90.91%;  $p < 0.0001$ ), while a WNT10B<sup>IVS1</sup> value lower then or  
 62 equal to 32 is suggestive for t-AMLs (AUC 0.96, sensitivity 100.0%, specificity 83.76;  $p$   
 63 0.0001). Similarly, a WNT10B<sup>IVS1</sup> value higher then 221 is indicative of non-CBF/APL or  
 64 non-therapy-related AMLs (AUC 1.0, sensitivity 100.0%, specificity 100.0%;  $p$  0.0001).

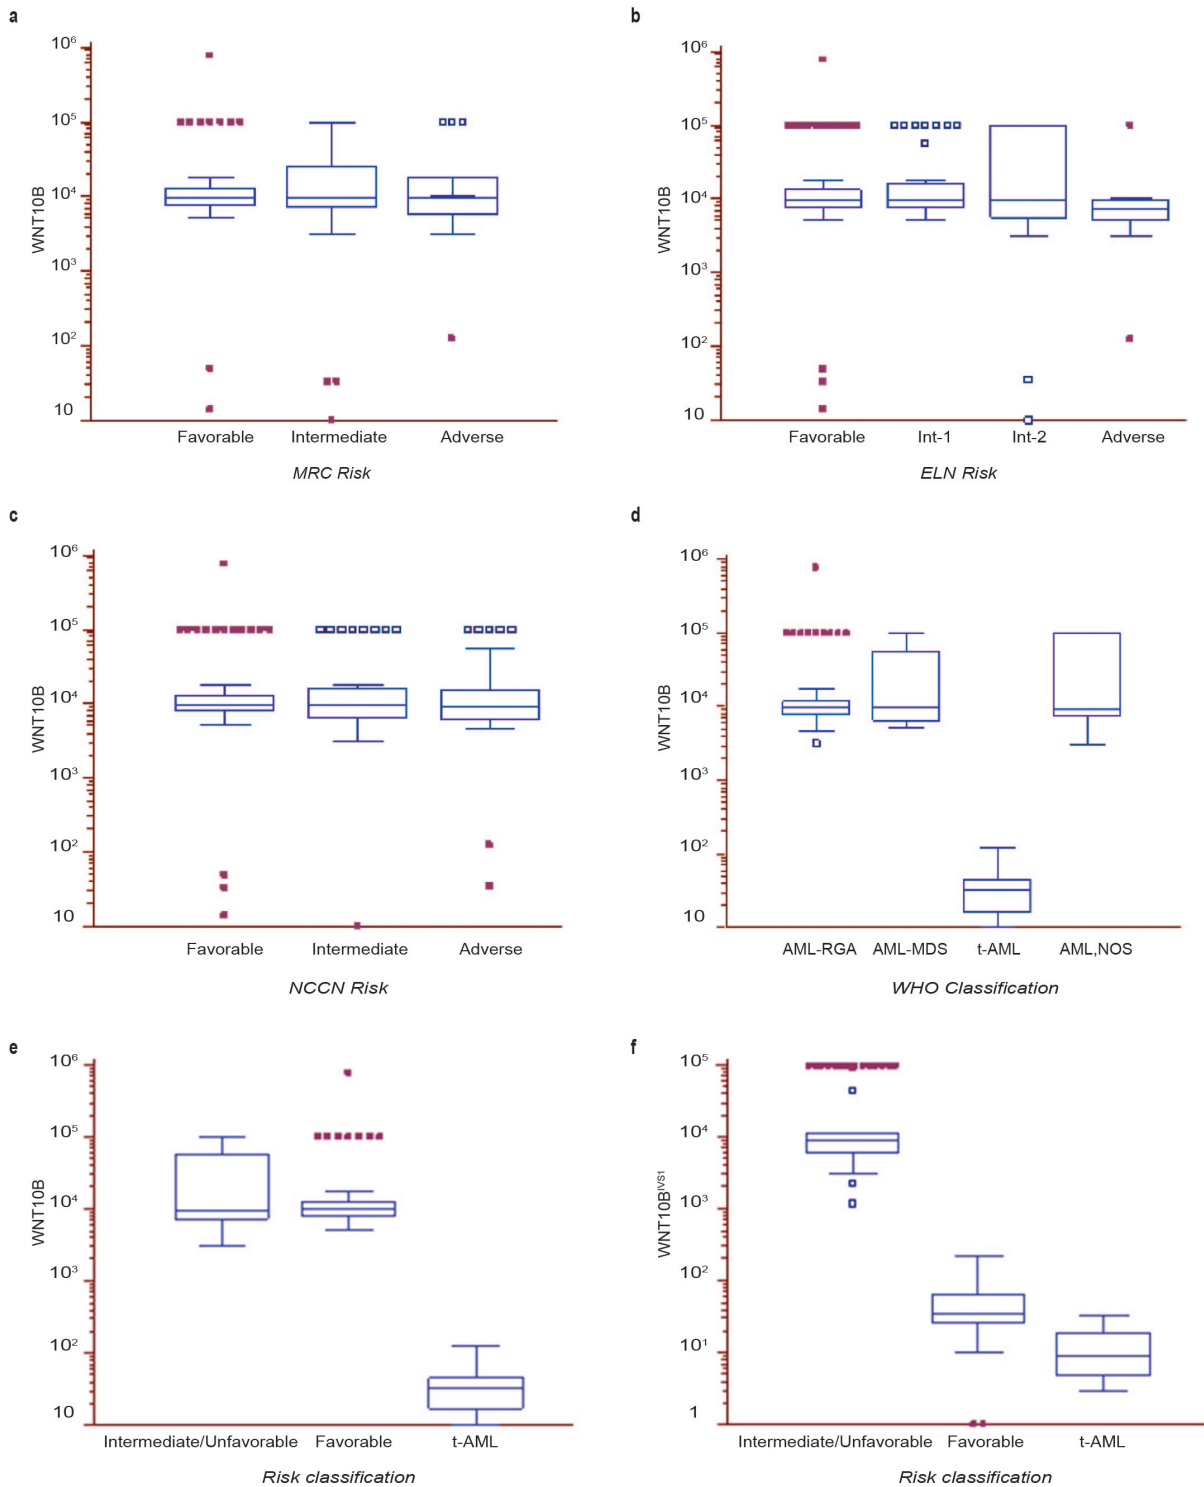

66

67 **Supplementary Figure 4. Box-plot distribution of WNT10B/WNT10B<sup>IVS1</sup> transcripts per**68 **AML classes.**

69 **a, b, c**, No significant difference in distribution of WNT10B transcript levels according to  
70 the MRC, ELN and NCNN classification systems ( $p$  0.6395,  $p$  0.4295, and  $p$  0.1786,  
71 respectively; Kruskal-Wallis test and comparative Mann-Whitney U-test). **d**, WNT10B  
72 transcript levels showed a statistical significant difference between the distinct WHO  
73 classes ( $p$  0.0002; Kruskal-Wallis test). Comparative Mann-Whitney U-test confirmed a  
74 significant reduction of WNT10B levels in t-AML *versus* the other WHO groups ( $p$  <0.002).  
75 No statistical significance in WNT10B levels was found between patients with recurrent  
76 genetic abnormalities, myelodysplasia-related features or AML not otherwise specified. **e, f**,  
77 Kruskal-Wallis statistical test WNT-based classification of AMLs ( $p$  <0.0001): comparative  
78 Mann-Whitney U-test endorsed a reduction of WNT10B (**e**) in patients with t-AML when  
79 compared with favorable-risk ( $p$  <0.0001) and Intermediate-Adverse patients ( $p$  <0.0001).  
80 WNT10B<sup>IVS1</sup> (**f**) levels in favorable-risk patients were statistically different from t-AML  
81 patients ( $p$  0.0012) and from Intermediate-Adverse AMLs ( $p$  <0.0001). Data represent mean  
82 values  $\pm$  s.d. AML-RGA: AML with recurrent genetic abnormalities, AML-MDS: AML with  
83 myelodysplasia-related features, t-AML: therapy-related AML, AML,NOS: AML, not  
84 otherwise specified  
85

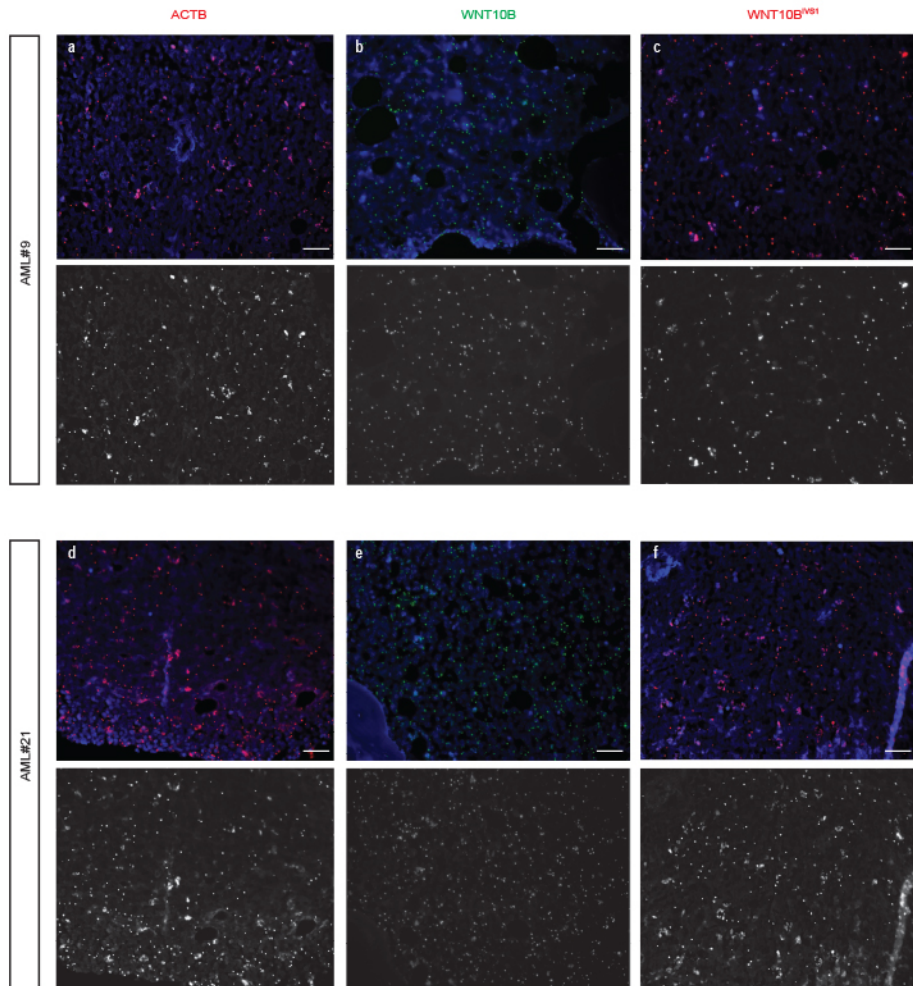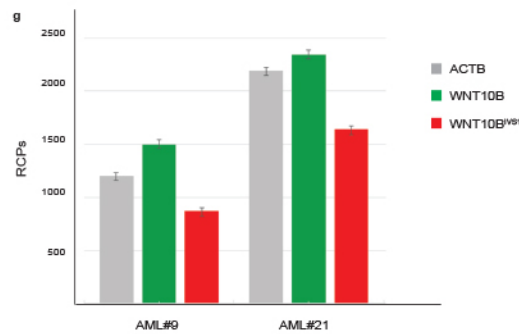

86

87 **Supplementary Figure 5. mRNA *in situ* detection of WNT10B/WNT10B<sup>IVS1</sup> transcripts**  
 88 **on AML bone marrow sections.**

89 In situ detection of  $\beta$ -actin (a, d), WNT10B (b, e) and WNT10B<sup>IVS1</sup> (c, f) in FFPE tissue  
 90 sections derived from AML#9 and AML#21 patients, using padlock probes and target-

91 primed RCA. Red RCPs (Cy3) represent  $\beta$ -actin and WNT10B<sup>IVS1</sup> respectively and  
92 WNT10B RCPs are shown in green (Cy5). Exposure times: DAPI 450 ms, Cy3 500 ms and  
93 Cy5 600 ms. Merged images in the upper side of each panel, and the grey scale RCPs are  
94 represented in the lower panel. Scale bar 20  $\mu$ m. **g**, Quantification of  $\beta$ -actin (grey),  
95 WNT10B (green) and WNT10B<sup>IVS1</sup> (red) RCPs using CellProfiler software. Data represent  
96 mean values  $\pm$  s.d.  
97



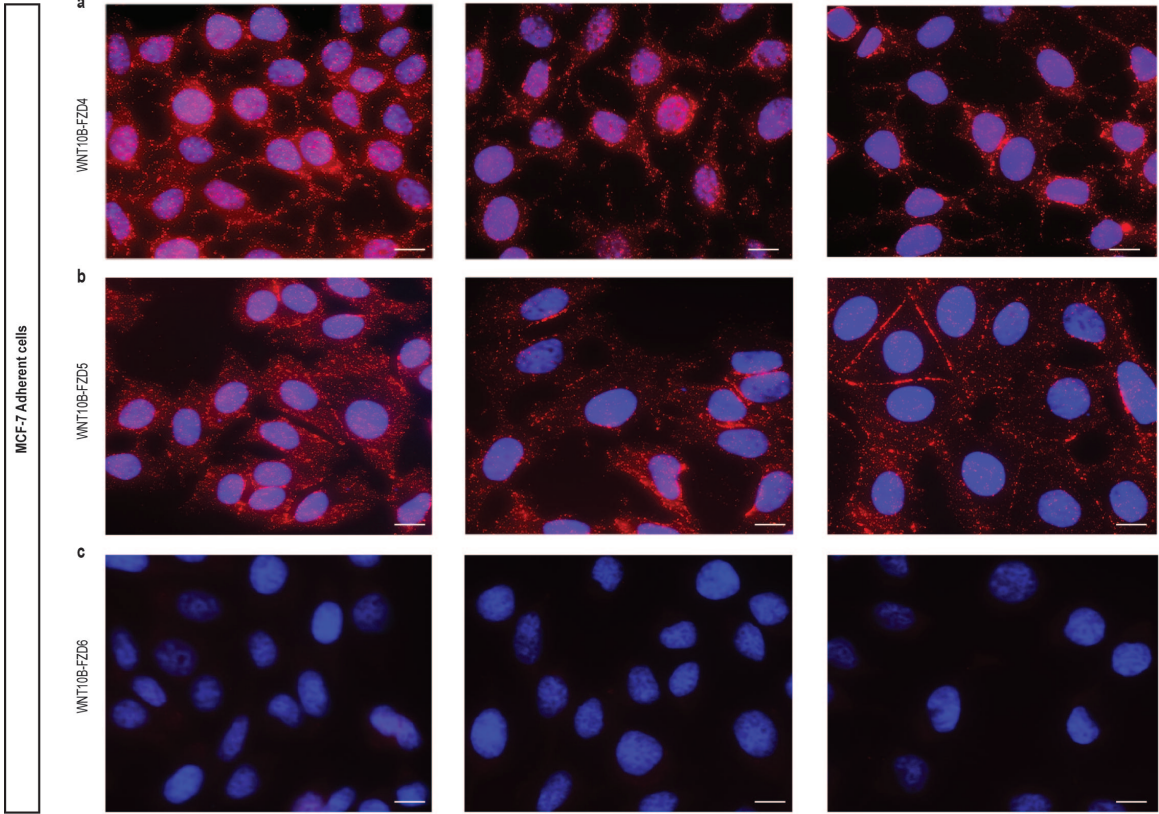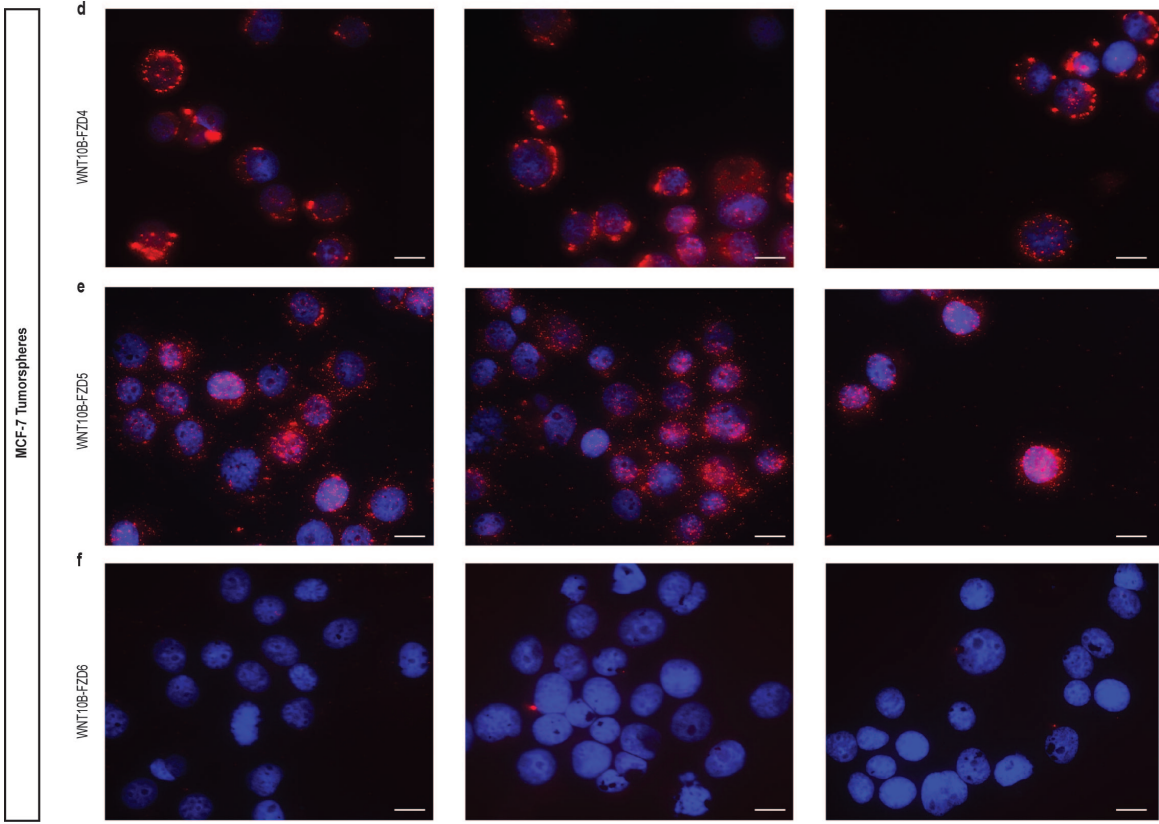

99 **Supplementary Figure 6. Detection of WNT10B-FZD4/5/6 complexes in MCF-7 cell**  
100 **line.**  
101 Detection of WNT10B-FZD4 (**a, d**), WNT10B-FZD5 (**b, e**) and WNT10B-FZD6 (**c, f**)  
102 interaction in MCF-7 adherent (upper panel) and tumorspheres (lower panel) cultured cells  
103 by *is*PLA. Three different Maximum-Intensity Projection (MIP) images per each interaction  
104 are represented. The RCPs are visualized using hybridization probes labeled with Alexa568  
105 (red), and the nuclei are visualized using Hoechst (blue). Exposure times MCF-7 adherent  
106 cells: DAPI 350 ms, Cy3 200 ms. Exposure times MCF-7 tumorspheres: DAPI 400 ms, Cy3  
107 350 ms. Images were acquired with x40 magnification. Scale bars 10  $\mu$ m.

**Table S1. Characteristics of AML patients**

| <b>Characteristics</b>                        |       |              |
|-----------------------------------------------|-------|--------------|
| <b>Patients, no.</b>                          | 125   |              |
| Median age, years (range)                     | 51    | (15 - 76)    |
| No. men/no. women                             | 67/58 |              |
| Median WBC, x 10 <sup>9</sup> /L (range)      | 16.3  | (0.3 - 345)  |
| Median Hb, g/dl (range)                       | 8.8   | (4.2 - 12.0) |
| Median PLT, x 10 <sup>9</sup> /L (range)      | 34.5  | (7 - 296)    |
| Median LDH, U/L (range)                       | 792   | (172 - 1500) |
| Median marrow blast, % (range)                | 75.0  | (23 - 98)    |
| Median peripheral blast, % (range)            | 58.0  | (0 - 97)     |
| Extramedullary disease, no. (%)               | 12    | (9.6)        |
| <b>Cytogenetic features</b>                   |       |              |
| Without additional abnormalities, no. (%)     | 48    | (38.4)       |
| No. Abnormalities, no. (%)                    | 13    | (10.4)       |
| Structure abnormalities, no. (%)              | 64    | (51.2)       |
| t(8;21)                                       | 18    |              |
| inv(16)/t(16;16)                              | 24 *  |              |
| t(15;17) or variant                           | 8     |              |
| <b>Mutational status</b>                      |       |              |
| FLT3-ITD mutated cases, no. (%)               | 15/86 | (17.4)       |
| FLT3-TKD mutated cases, no. (%)               | 5/83  | (6.0)        |
| NPM1 mutated cases, no. (%)                   | 20/46 | (43.5)       |
| Biallelic CEBPA mutated cases, no. (%)        | 2/11  | (--)         |
| KIT mutated cases, no. (%)                    | 15/42 | (35.7)       |
| <b>Classification</b>                         |       |              |
| <i>de novo</i> AML, no.                       | 112   |              |
| AML with myelodysplasia-related features, no. | 6     |              |
| Therapy-related AML, no.                      | 7 *   |              |

\* Two patients presenting with CBF-AML inv(16)(p13q22) and one patient with normal karyotype AML with NPM1 mutation were clinically considered as to have a t-AML because of a prior exposure to cytotoxic agents with an adequate latency period. Analysis for WNT10B-WNT10B<sup>IVS1</sup> succeeded in recognize these t-AML, confirming the lacking of both WNT transcripts.

**Table S2. t-AML prototypic cases**

**AML#280**

| Age, y / Sex | Tumor Histology                                  | Elston Grading | TNM    | Er, % | PgR, % | c-Erb-B2 (HER2) | MIB1, % | Therapies †                                             |
|--------------|--------------------------------------------------|----------------|--------|-------|--------|-----------------|---------|---------------------------------------------------------|
| 76 / F       | Invasive ductal carcinoma, poorly-differentiated | G3             | pT1cN0 | 70    | 60     | 2+              | 35-40   | Radiation therapy (50 Gy)<br>Adjuvant endocrine therapy |

†: treatment schedule:

- Adjuvant endocrine therapy: tamoxifene 20 mg die per 2 years, then anastrozole 1 mg die

| Age, y / Sex | FAB | Cytogenetic | FLT3 | NPM1    | CEBPA     | WBC, x10 <sup>9</sup> /L | MO Blast, % | Therapies †     | Outcome        |
|--------------|-----|-------------|------|---------|-----------|--------------------------|-------------|-----------------|----------------|
| 77 / F       | M1  | 46,XX       | ITD  | Exon 12 | wild type | 148.0                    | 90          | “7+2” induction | D/prim ref dis |

D, death; F, female; prim ref dis, MO, medullary; primary refractory disease

†: treatment schedule:

- “7+2” induction therapy: cytarabine 100 mg/mq in continuous infusion per 7 days + idarubicin 12 mg/mq per 2 days

**t-AML#6**

| Age, y / Sex | Tumor Histology                                        | Elston Grading | TNM                | Er, % | PgR, % | c-Erb-B2 (HER2) | MIB1, % | Therapies †                                         |
|--------------|--------------------------------------------------------|----------------|--------------------|-------|--------|-----------------|---------|-----------------------------------------------------|
| 41 / F       | Invasive ductal carcinoma, moderately-differentiated ‡ | G2             | pT1c(m)<br>N1(mic) | 15    | 70     | 1+              | ---     | Adjuvant chemotherapy<br>Adjuvant endocrine therapy |

‡: family history of breast cancer (mother, sister, maternal aunt): non mutated BRCA1 and BRCA2

†: treatment schedule:

- FAC chemotherapy: cyclophosphamide + doxorubicin + fluorouracil per 2 cycles
- Adjuvant endocrine therapy: anastrozole 1 mg die per 1 year, tamoxifene 20 mg die per 1 year, then exemestane 25 mg die

| Age, y / Sex | FAB | Cytogenetic | FLT3      | NPM1      | CEBPA     | WBC, x10 <sup>9</sup> /L | MO Blast, % | Therapies †                                             | Outcome        |
|--------------|-----|-------------|-----------|-----------|-----------|--------------------------|-------------|---------------------------------------------------------|----------------|
| 44 / F       | MO  | Complex ‡   | wild type | wild type | wild type | 15.1                     | 90          | "7+3" induction<br>FLAIRG salvage<br>Clofa-AraC salvage | D/prim ref dis |

D, death; F, female; MO, medullary; prim ref dis, primary refractory disease

‡: 45,XX,dic(5;14)(q10;p12),-7,del(12)(p13),+14,del(17)(q23),+der(14)del(14)(q13q22)

†: treatment schedule:

- "7+3" induction therapy: cytarabine 100 mg/mq in continuous infusion per 7 days + idarubicin 12 mg/mq per 3 days
- FLAIRG salvage: fludarabine 15 mg/mq bid per 5 days + cytarabine 1000 mg/mq bid per 5 days + idarubicin 10 mg/mq per 2 days
- Clofa-AraC salvage: clofarabine 22.5 mg/mq per 5 days + cytarabine 1000 mg/mq bid per 5 days

**Table S3. Non Familiar Breast Cancer (NFBC) patients**

| # Patient | Age diagnosis | Tumor Histology                                               | Elston Grading | TNM*       | Er † (%) | PgR‡ (%) | c-Erb-B2 (HER2) | Ki67 (%) |
|-----------|---------------|---------------------------------------------------------------|----------------|------------|----------|----------|-----------------|----------|
| 28        | 49            | Invasive Ductal Carcinoma, moderately differentiated          | G2             | na         | 10       | 10       | na              | 15       |
| 29        | 59            | Multiple Invasive Ductal Carcinoma, moderately differentiated | G2             | pT2 (m);N0 | 10       | 10       | na              | 25       |

\*:TNM classification: T primary tumor site, N regional lymphnode involvement, M presence of distant metastatic spread.

†:Estrogen Receptors

‡: Progesterone Receptors

**Table S4 .Oligonucleotide sequences**

| Zebrafish Primers | Sequences (5'-3')        |
|-------------------|--------------------------|
| Zf-Wnt10b_P1      | ATGGAGTTACCCACAGACAG     |
| Zf-Wnt10b_P2      | GAGTGGGTTAATGTGTGCAAGTGA |

| Primers                     | Sequences (5'-3')              |
|-----------------------------|--------------------------------|
| WNT10B_P1                   | CTCCTCCAGCATGTCTGAAGC          |
| UNK_P2                      | GCCACGTGCGACTAGTAC             |
| WNT10B <sup>IVS1</sup> _P3  | CCTGAACCCGCATCAAGTCTC          |
| WNT10B_P4                   | GCAGCACTAGTAAGCCCAG            |
| WNT10B_P5                   | ATCTCATTGCTTAGAGCCCGAC         |
| GAPDH_P6                    | ACCTGCCAAATATGATGACATC         |
| GAPDH_P7                    | CAGTGTAGCCCAGGATGC             |
| WNT10B_P8                   | C+A+G+G+C+CGGACAGCGTCAAGCACACG |
| ACTB_P9                     | C+TG+AC+CC+AT+GCCCACCATCACGCCC |
| WNT10B <sup>IVS1</sup> _P10 | CAAGGTAAGGCTGACCCTCAC          |
| WNT10B_P11                  | GAGAAGGCTACACATCCCAGAG         |
| FZD4_P12                    | GGCGGCATGTGTCTTTTCAGT          |
| FZD4_P13                    | GAATTTGCTGCAGTTCAGACTCTCT      |
| FZD5_P14                    | CGCGAGCACAACCACATC             |
| FZD5_P15                    | AGAAGTAGACCAGGAGGAAGACGAT      |
| FZD6_P16                    | ACAAGCTGAAGGTCATTTCCAAA        |
| FZD6_P17                    | GCTACTGCAGAAGTGCCATGAT         |
| FZD8_P18                    | GCTCGGTCATCAAGCAACAG           |
| FZD8_P19                    | ACGGTGTAGAGCACGGTGAAC          |
| M13_P20                     | TTGTAAAACGACGGCCAGT            |
| M13_P21                     | CAGGAAACAGCTATGACC             |

+ =LNA-modified base.

| <b>TaqMan Probes</b>        | <b>Sequences (5'-3')</b>                |
|-----------------------------|-----------------------------------------|
| WNT10B_dd1                  | [6FAM] CACCCAAACCACTGGAGTCCTGATCG[BHQ1] |
| WNT10B <sup>IVS1</sup> _dd2 | [HEX] TCTCCCGTCCCGCAGGTCCTGATCG[BHQ1]   |

| <b>Padlock Probes</b>       | <b>Sequences (5'-3')</b>                                                                              |
|-----------------------------|-------------------------------------------------------------------------------------------------------|
| WNT10B_PP1                  | [Phos]-ACCGTGCCTGTCGGACCCTCCTCTATGATTACTGACCTAAGT<br>CGGAAGTACTACTCTCTTCTTCTTTTAGTGAAGCCCAGGCAACCCA   |
| WNT10B <sup>IVS1</sup> _PP2 | [Phos]-AGTCTCCCGTCCCGCAGGTCCTCTATGATTACTGACCTA<br>TGCGTCTATTTAGTGGAGCCTCTTCTTTCTATTCCTGAACCCGCATCA    |
| ACTB_PP3                    | [Phos]-GCCGGCTTCGCGGGCGACGATTCCTCTATGATTACTGACCTA<br>TGCGTCTATTTAGTGGAGCCTCTTCTTTACGGCGCCGGCATGTGCAAG |

| <b>Detection Probes</b> | <b>Sequences (5'-3')</b>    |
|-------------------------|-----------------------------|
| DP1                     | [Cy3]-TGCGTCTATTTTAGTGGAGCC |
| DP2                     | [Cy5]-AGTCGGAAGTACTACTCTCT  |

| <b>PLA oligonucleotides</b> | <b>Sequences (5'-3')</b>                         |
|-----------------------------|--------------------------------------------------|
| Compaction Oligo_C1         | AGAGAGTAGTACAGCAGCCGTAAGAGAGTAGTACAGCAGCCGT(UUU) |
| Detection Oligo_D1          | CAGTGAATGCGAGTCCGTCT(UUU)                        |
